# Supplementary material for: Synthesis and Characterization of Reduced Graphene Oxide-Supported Nanoscale Zero-Valent Iron (nZVI/rGO) Composites Used for Pb(II) Removal
Source: MDPI journal article supplement (doi:10.3390/ma9080687), 2016-08-12
Supplement: s1 [file s1]

# Supplementary Materials: Synthesis and Characterization of Reduced Graphene Oxide-Supported Nanoscale Zero-Valent Iron (nZVI/rGO) Composites Used for Pb(II) Removal

Mingyi Fan, Tongjun Li, Jiwei Hu, Rensheng Cao, Qing Wu, Xionghui Wei, Lingyun Li, Xuedan Shi and Wenqian Ruan

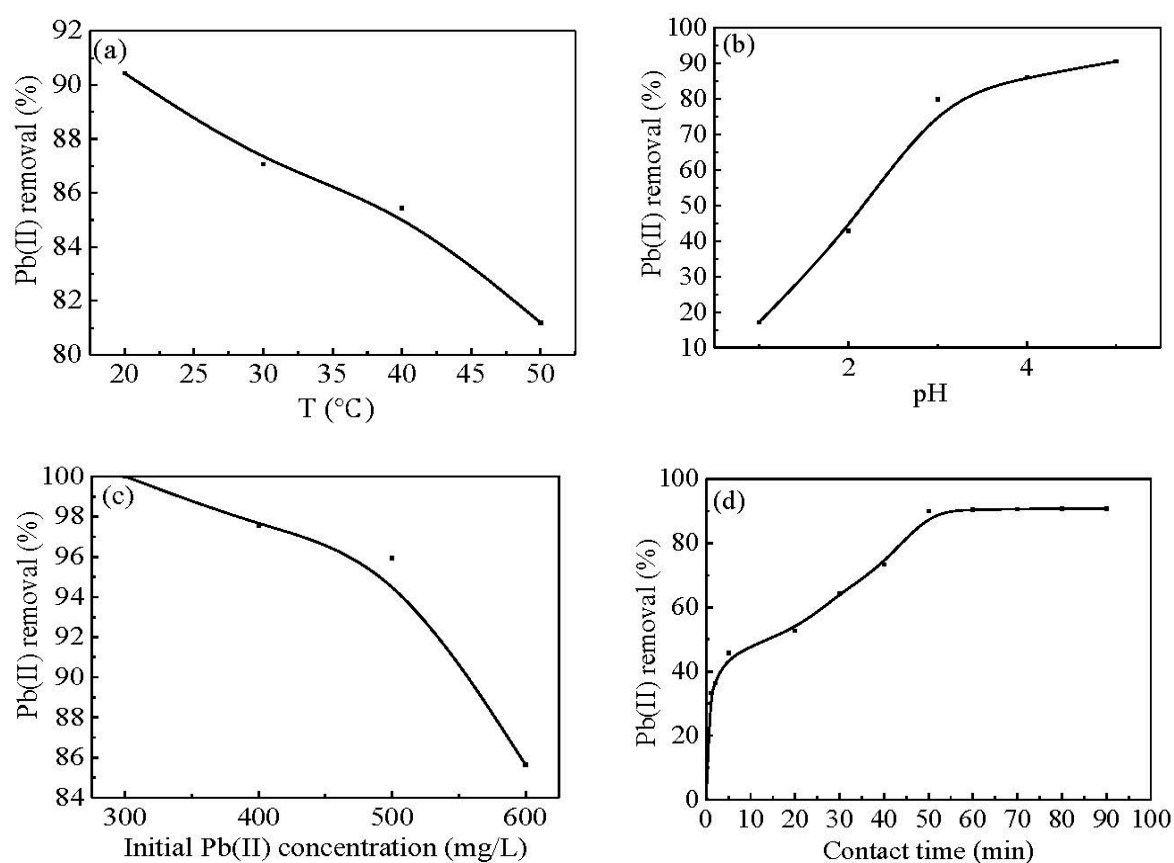

**Figure S1.** Effect of temperature on Pb(II) removal by nZVI/rGO composites: pH = 5.0; nZVI/rGO composites dosage = 30 mg; Pb(II) concentration = 600 mg/L; and time = 1 h (a). Effect of pH on Pb(II) removal by nZVI/rGO composites: Temperature = 20 °C; nZVI/rGO composites dose = 30 mg; Pb(II) concentration = 600 mg/L; and time = 1 h (b). Effect of initial Pb(II) concentration removal by nZVI/rGO composites: Temperature = 20 °C; pH = 5.0; nZVI/rGO composites dose = 30 mg; and time = 1 h (c). Effect of contact time on Pb(II) removal by nZVI/rGO composites: Temperature = 20 °C; pH = 5.0; nZVI/rGO composites dose = 30 mg; and Pb(II) concentration = 600 mg/L (d).

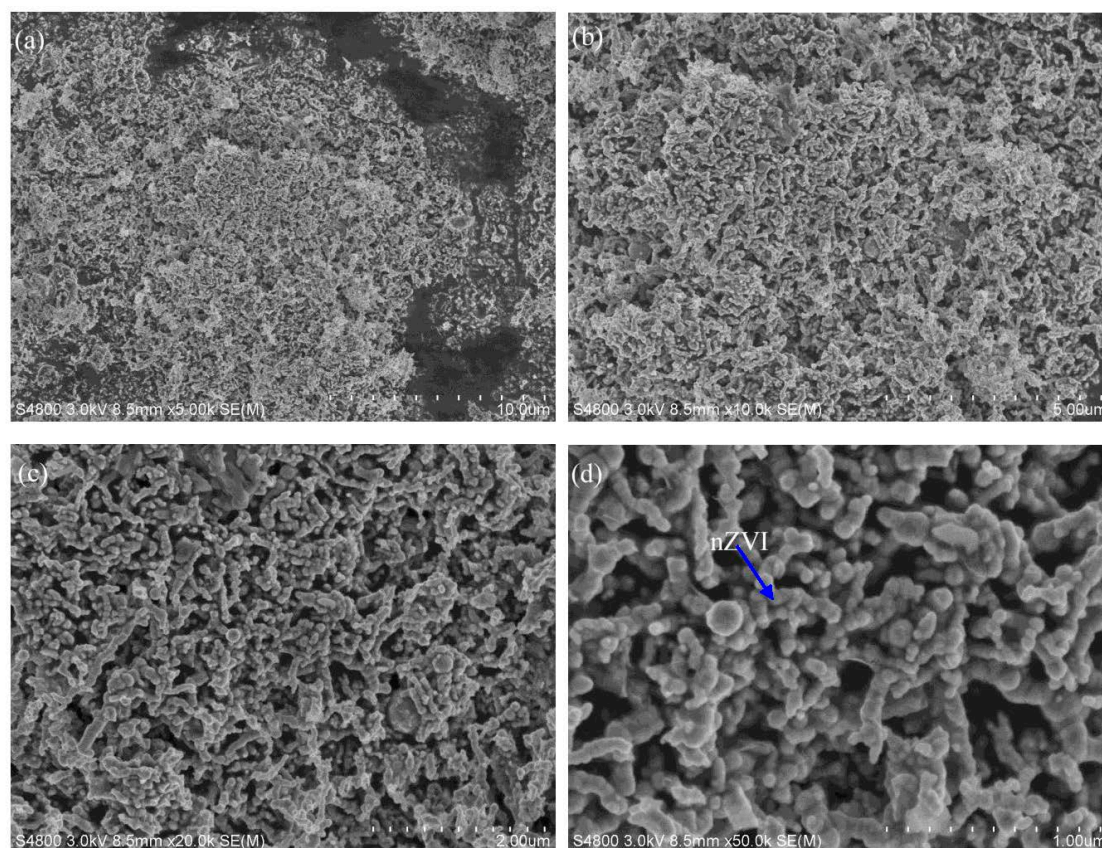

**Figure S2.** SEM image of nZVI (a) and the corresponding magnified images (b–d) respectively.

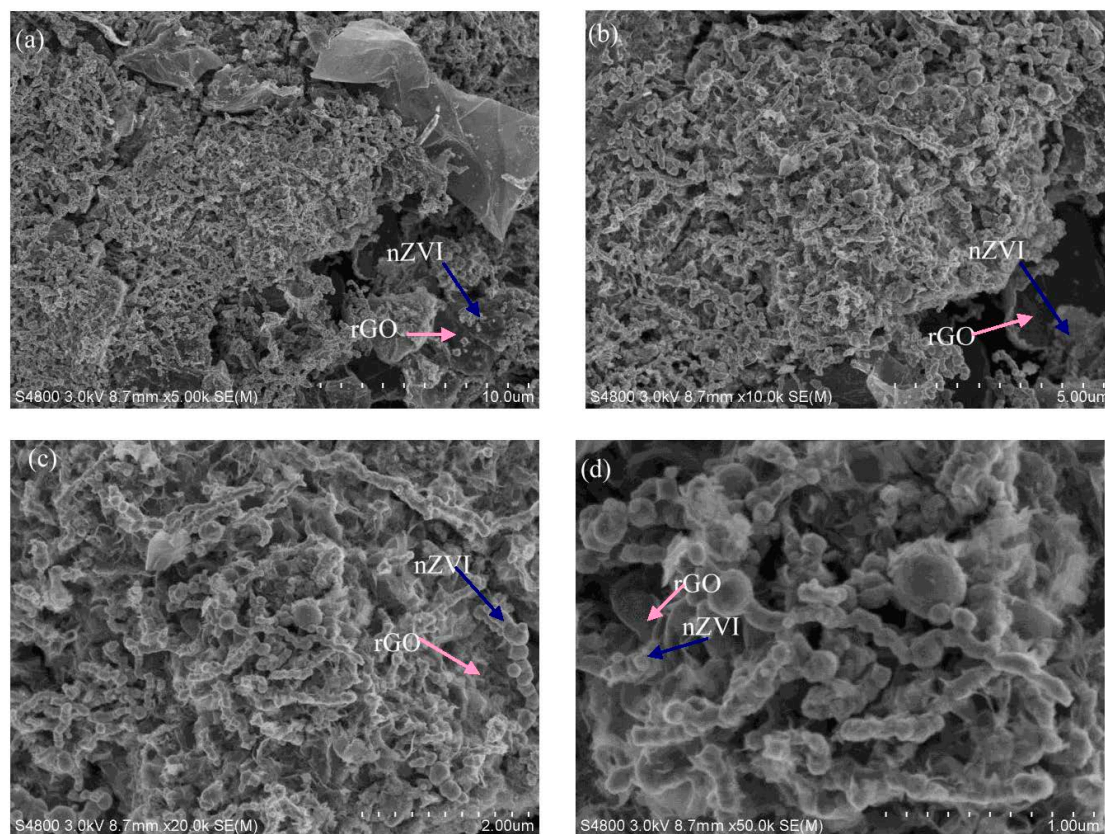

**Figure S3.** SEM image of nZVI/rGO composites (a) and the corresponding magnified images (b–d) respectively.
